# Supplementary material for: Serological Evidence of Crimean–Congo Haemorrhagic Fever in Livestock in the Omaheke Region of Namibia
Source: MDPI journal article supplement (doi:10.3390/microorganisms12040838), 2024-04-22
Supplement: s1 [file s1]

Table S1: A summary table displaying ELISA test results for CCHF conducted on 100 cattle from 24 farms sampled at an auction gathering.

| Farm No. | No.<br>sampled | No.<br>positive | %<br>Positive |
|----------|----------------|-----------------|---------------|
| 1        | 4              | 2               | 50            |
| 2        | 4              | 3               | 75            |
| 3        | 4              | 3               | 75            |
| 4        | 1              | 0               | 0             |
| 5        | 5              | 4               | 80            |
| 6        | 1              | 1               | 100           |
| 7        | 3              | 3               | 100           |
| 8        | 2              | 1               | 50            |
| 9        | 2              | 2               | 100           |
| 10       | 1              | 1               | 100           |
| 11       | 10             | 8               | 80            |
| 12       | 2              | 0               | 0             |
| 13       | 3              | 0               | 0             |
| 14       | 7              | 1               | 14            |
| 15       | 1              | 0               | 0             |
| 16       | 3              | 1               | 33            |
| 17       | 5              | 2               | 40            |
| 18       | 28             | 3               | 11            |
| 19       | 7              | 1               | 14            |
| 20       | 3              | 0               | 0             |
| 21       | 1              | 0               | 0             |
| 22       | 1              | 0               | 0             |
| 23       | 1              | 0               | 0             |
| 24       | 1              | 0               | 0             |
| TOTAL    | 100            | 36              | 36            |
