# Supplementary material for: Serological Evidence of Crimean–Congo Haemorrhagic Fever in Livestock in the Omaheke Region of Namibia
Source: MDPI journal article supplement (doi:10.3390/microorganisms12040838), 2024-04-22
Supplement: s1 [file s1]

Table S2: A summary table depicting the ELISA test results for CCHF in sheep sampled from 22 farms at an auction.

| Farm No. | No.<br>sampled | No.<br>positive | %<br>Positive |
|----------|----------------|-----------------|---------------|
| 1        | 2              | 0               | 0             |
| 2        | 7              | 0               | 0             |
| 3        | 4              | 0               | 0             |
| 4        | 10             | 1               | 10            |
| 5        | 3              | 0               | 0             |
| 6        | 12             | 9               | 75            |
| 7        | 1              | 1               | 100           |
| 8        | 1              | 0               | 0             |
| 9        | 5              | 3               | 60            |
| 10       | 16             | 2               | 13            |
| 11       | 3              | 1               | 33            |
| 12       | 7              | 1               | 14            |
| 13       | 5              | 0               | 0             |
| 14       | 3              | 0               | 0             |
| 15       | 2              | 0               | 0             |
| 16       | 1              | 0               | 0             |
| 17       | 4              | 1               | 25            |
| 18       | 3              | 1               | 33            |
| 19       | 6              | 2               | 33            |
| 20       | 3              | 0               | 0             |
| 21       | 1              | 0               | 0             |
| 22       | 1              | 0               | 0             |
| TOTAL    | 100            | 22              | 22            |
